# Supplementary material for: Neuromyths in Education: Prevalence Among South Indian School Teachers
Source: Frontiers journal article supplement (doi:10.3389/feduc.2022.781735), 2022-03-11
Supplement: Data_Sheet_1.doc [file Data_Sheet_1.doc]

Table:1A

*Prevalence of Neuromyths in South Indian Teachers- Gender based description*

| *S.No.* | *Neuromyths* | Male-226 | | | Female-277 | | |
| --- | --- | --- | --- | --- | --- | --- | --- |
| Agree | Undecided | Disagree | Agree | Undecided | Disagree |
| 1 | We mostly only use 10% of our brain | 62.4 | 8.8 | 28.8 | 65.7 | 9.4 | 24.9 |
| 2 | “Individuals learn better when they receive information in their preferred learning style” (for example, visual, auditory or kinesthetic) | 74.8 | 6.6 | 18.6 | 91 | 3.6 | 5.4 |
| 3 | “Short bouts of co‑ordination exercises can improve integration of left and right hemispheric brain function” | 59.7 | 28.8 | 11.5 | 61.4 | 32.5 | 6.1 |
| 4 | “Differences in hemispheric dominance (left brain or right brain) can help to explain individual differences amongst learners” | 50.4 | 34.1 | 15.5 | 57 | 30.7 | 12.3 |
| 5 | Children are less attentive after sugary drinks and snacks | 58.4 | 13.3 | 28.3 | 61 | 13 | 26 |
| 6 | “Drinking less than 6 to 8 glasses of water a day can cause the brain to shrink” | 38.1 | 25.7 | 36.3 | 40.4 | 25.6 | 33.6 |
| 7 | “Learning problems associated with developmental differences in brain function cannot be remediated by education” | 41.6 | 22.1 | 36.3 | 40.4 | 18.4 | 41.2 |

- All in percentage

Table:2A

*Prevalence of Neuromyths in South Indian Teachers- Educational background description*

| *S.No.* | *Neuromyths* | Under Graduation-149 | | | Post Graduatin-279 | | | Mhil-30 | | | PhD-45 | | |
| --- | --- | --- | --- | --- | --- | --- | --- | --- | --- | --- | --- | --- | --- |
| Agree | Undecided | Disagree | Agree | Undecided | Disagree | Agree | Undecided | Disagree | Agree | Undecided | Disagree |
| 1 | We mostly only use 10% of our brain | 62.4 | 9.4 | 28.2 | 63.8 | 8.2 | 28 | 73.3 | 13.3 | 13.3 | 66.7 | 11.1 | 22.2 |
| 2 | “Individuals learn better when they receive information in their preferred learning style” (for example, visual, auditory or kinesthetic) | 82.6 | 6.7 | 10.7 | 83.5 | 4.3 | 12.2 | 96.7 | --- | 3.3 | 80 | 6.7 | 13.3 |
| 3 | “Short bouts of co‑ordination exercises can improve integration of left and right hemispheric brain function” | 57 | 32.2 | 10.7 | 61.3 | 30.5 | 8.2 | 90 | 10 | --- | 48.9 | 42.2 | 8.9 |
| 4 | “Differences in hemispheric dominance (left brain or right brain) can help to explain individual differences amongst learners” | 49 | 37.6 | 13.4 | 55.6 | 28.3 | 16.1 | 73.3 | 23.3 | 3.3 | 48.9 | 44.4 | 6.7 |
| 5 | Children are less attentive after sugary drinks and snacks | 56.4 | 16.1 | 27.5 | 62 | 11.5 | 26.5 | 60 | 10 | 30 | 57.8 | 15.6 | 26.7 |
| 6 | “Drinking less than 6 to 8 glasses of water a day can cause the brain to shrink” | 43.6 | 23.5 | 32.6 | 37.6 | 26.2 | 36.2 | 43.3 | 36.7 | 20 | 33.3 | 22.2 | 44.4 |
| 7 | “Learning problems associated with developmental differences in brain function cannot be remediated by education” | 47 | 19.5 | 33.6 | 35.8 | 21.1 | 43 | 56.7 | 13.3 | 30 | 42.2 | 20 | 37.8 |

- All in percentage

Table:3A

*Prevalence of Neuromyths in South Indian Teachers- Students level they engage in.*

| *S.No.* | *Neuromyths* | Primary-318 | | | Secondary-131 | | | Tertiary-54 | | |
| --- | --- | --- | --- | --- | --- | --- | --- | --- | --- | --- |
| Agree | Undecided | Disagree | Agree | Undecided | Disagree | Agree | Undecided | Disagree |
| 1 | We mostly only use 10% of our brain | 63.2 | 9.1 | 27.7 | 65.3 | 9.7 | 25 | 68.5 | 9.3 | 22.2 |
| 2 | “Individuals learn better when they receive information in their preferred learning style” (for example, visual, auditory or kinesthetic) | 81.4 | 5 | 13.5 | 85.5 | 4.8 | 9.7 | 90.7 | 5.6 | 3.7 |
| 3 | “Short bouts of co‑ordination exercises can improve integration of left and right hemispheric brain function” | 62.9 | 28.6 | 8.5 | 50 | 37.9 | 12.1 | 66.7 | 31.5 | 1.9 |
| 4 | “Differences in hemispheric dominance (left brain or right brain) can help to explain individual differences amongst learners” | 51.9 | 33.3 | 14.8 | 53.2 | 32.3 | 14.5 | 64.8 | 27.8 | 7.4 |
| 5 | Children are less attentive after sugary drinks and snacks | 60.7 | 15.4 | 23.9 | 55.6 | 6.5 | 37.9 | 63 | 16.7 | 20.4 |
| 6 | “Drinking less than 6 to 8 glasses of water a day can cause the brain to shrink” | 38.4 | 23.6 | 38.1 | 41.9 | 27.4 | 30.6 | 37 | 31.5 | 31.5 |
| 7 | “Learning problems associated with developmental differences in brain function cannot be remediated by education” | 45 | 18.9 | 36.2 | 33.1 | 21.8 | 45.2 | 37 | 33 | 40.7 |

- All in percentage
